# Supplementary material
Source: ML conference proceedings conference paper supplement (https://openaccess.thecvf.com/content/ICCV2021/html/Selvaraju_BuildingNet_Learning_To_ICCV_2021_paper.html)
Supplement: Supplementary file 2 [file Selvaraju_BuildingNet_Learning_To_ICCV_2021_supplemental.zip]

Archive with 2 entries (2 files):
- supplementary.pdf
- video_UI_tutorial_parts.mp4
